# Supplementary material for: Unusual deactivation of HZSM-5 zeolite in the methanol to hydrocarbon reaction
Source: Royal Society of Chemistry journal article supplement (doi:10.1039/c6cy02459a), 2017-01-01
Supplement: c6cy02459a1.pdf [file c6cy02459a1.pdf]

## Supporting Information

# Unusual Deactivation of HZSM-5 Zeolite in Methanol to Hydrocarbon Reaction

*Liang Qi<sup>ab</sup>, Jinzhe Li<sup>a</sup>, Linying Wang<sup>a</sup>, Lei Xu<sup>\*a</sup> and Zhongmin Liu<sup>\*a</sup>*

<sup>a</sup> National Engineering Laboratory for Methanol to Olefins, Dalian National Laboratory for Clean Energy, iChEM (Collaborative Innovation Center of Chemistry for Energy Materials), Dalian Institute of Chemical Physics, Chinese Academy of Sciences, Dalian 116023, People's Republic of China;

<sup>b</sup> University of Chinese Academy of Sciences, Beijing 100049, P. R. China;

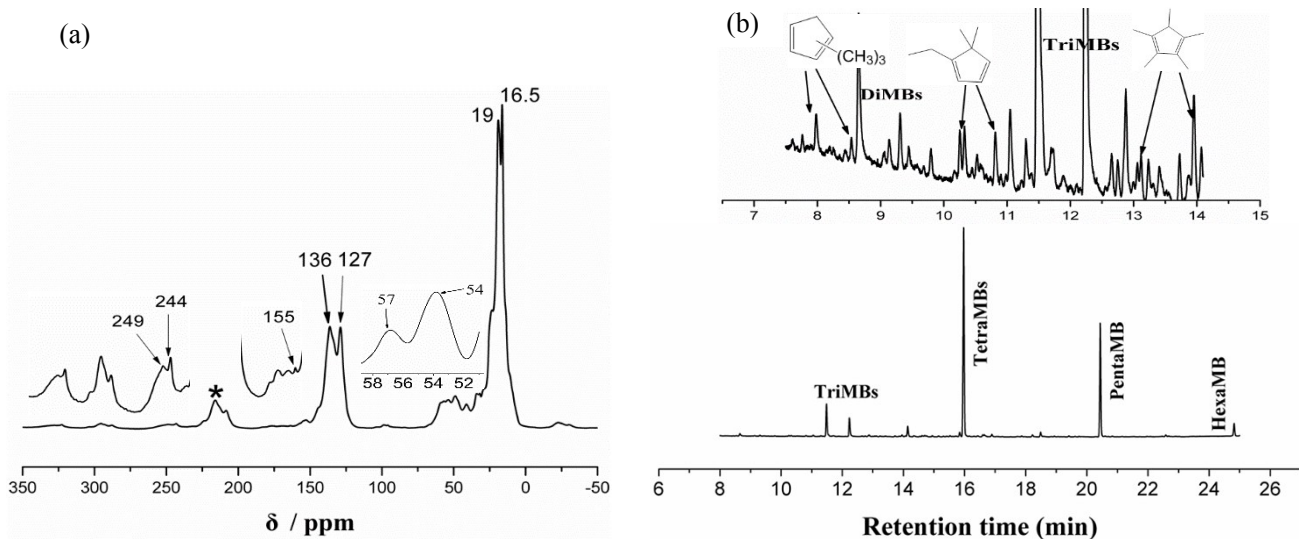

**Figure S1.**  $^{13}\text{C}$  CP MAS NMR spectra of HZSM-5 with retained organics when the temperature reached 287 °C for the continuous-flow  $^{13}\text{C}$ -methanol TP-MTH reaction (a) and GC-MS analysis of retained material in catalyst when temperature reached 287 °C for the continuous-flow  $^{12}\text{C}$ -methanol TP-MTH reaction (b). The asterisk denotes spinning side bands.

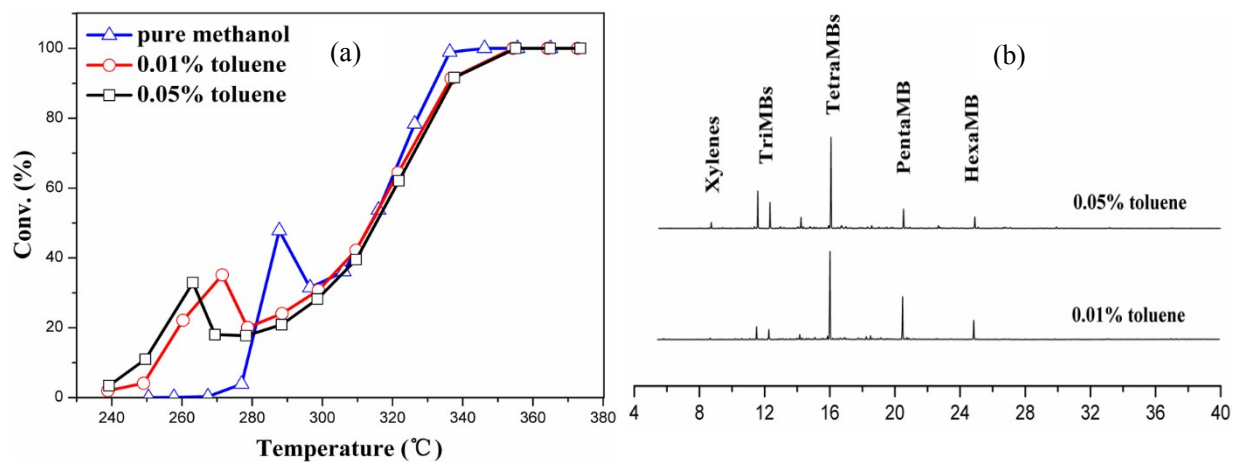

**Figure S2.** Effect of co-feeding 0.01 % and 0.05 % (wt. %) toluene on methanol conversion (a) and GC-MS analysis of retained substances at the deactivation point for methanol co-fed with different amount of toluene (b) during the TP-MTH reaction.

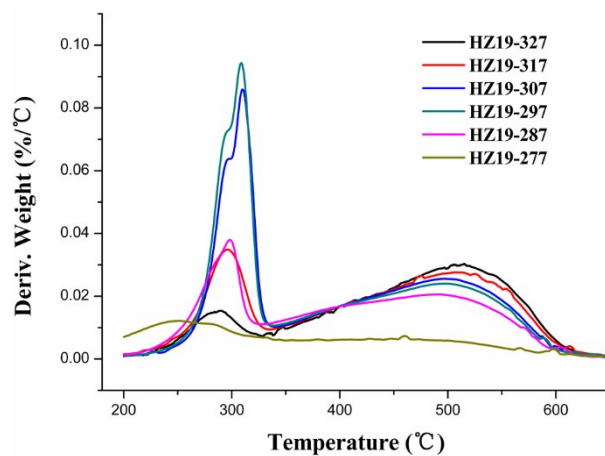

**Figure S3.** DTG results of retained material during TP-MTH reaction.

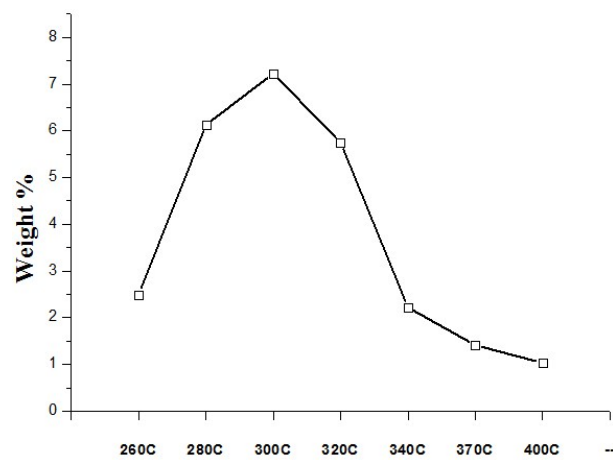

**Figure S4.** Amount of retained species after 30 min of MTH reaction at different reaction temperatures.

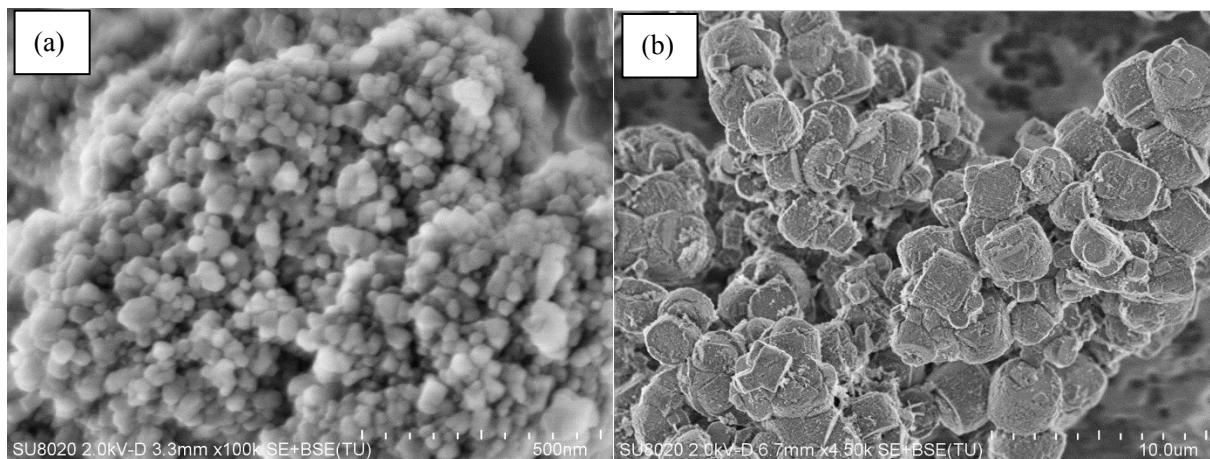

**Figure S5.** SEM images of the samples for NZ-20 (a) and MZ-21 (b).

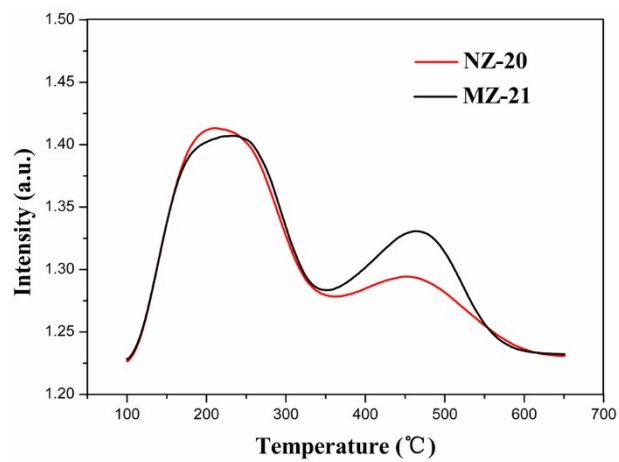

**Figure S6.** NH<sub>3</sub>-TPD profiles of NZ-20 and MZ-20.

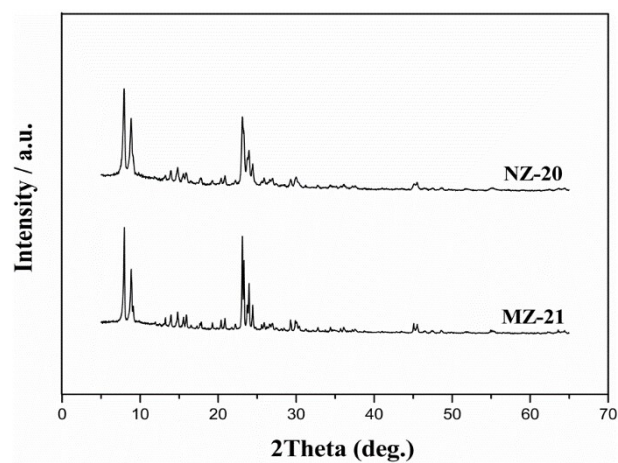

**Figure S7.** XRD patterns of the two synthesized HZSM-5 catalysts

**Table S1.** Elemental composition and N<sub>2</sub> sorption characteristics of NZ-20 and MZ-20

| Sample | Si/Al <sup>a</sup> | S <sub>BET</sub> (m <sup>2</sup> /g) | S <sub>micro</sub> (m <sup>2</sup> /g) <sup>b</sup> | S <sub>ext</sub> (m <sup>2</sup> /g) <sup>b</sup> | V <sub>total</sub> (mL/g) <sup>c</sup> |
|--------|--------------------|--------------------------------------|-----------------------------------------------------|---------------------------------------------------|----------------------------------------|
| NZ-20  | 20                 | 404                                  | 243                                                 | 161                                               | 0.12                                   |
| MZ-21  | 21                 | 356                                  | 336                                                 | 20                                                | 0.154                                  |

<sup>a</sup> XRF

<sup>b</sup> t-method

<sup>c</sup> Volume adsorbed at p/p<sub>0</sub> = 0.97
